# Supplementary material for: Intergenerational longitudinal associations between parental reading/musical traits, infants’ auditory processing, and later phonological awareness skills
Source: Front Neurosci. 2023 Jul 19;17:1201997. doi: 10.3389/fnins.2023.1201997 (PMC10394385; doi:10.3389/fnins.2023.1201997)
Supplement: Supplementary file 1 [file Data_Sheet_1.xlsx]

## Sheet: Supplementary Table S1
Supplementary Table S1A: Descriptive statistics of reading variables computed on the overall sample of parents
	N	Min	Max	Mean	SD
Text reading Accuracy	203	-9.00	2.27	-0.65	1.98
Text reading Speed	203	-10.00	3.63	-0.69	2.14
Word reading Accuracy	204	-2.73	0.79	0.27	0.75
Word reading Speed	204	-6.78	1.68	-0.48	1.21
Non-word reading Accuracy	204	-4.29	1.30	0.55	0.83
Non-word reading Speed	204	-4.94	1.46	-0.20	1.01
Composite:Reading Accuracy	205	-3.70	1.39	0.06	0.99
Composite:Reading Speed	205	-7.05	1.81	-0.45	1.29
Reading Self-report	344	0.00	15.00	2.71	2.36
Supplementary Table S1B: Pearson correlations among reading variables computed on the overall sample of parents (N=205)
		Text reading Accuracy	Text reading Speed	Word reading Accuracy	Word reading Speed	Non-word reading Accuracy	Non-word reading Speed	Composite: Reading Accuracy	Composite: Reading Speed
Text reading Accuracy	r	--
	p
Text reading Speed	r	.527**	--
	p	<.001
Word reading Accuracy	r	.476**	.340**	--
	p	<.001	<.001
Word reading Speed	r	.264**	.610**	.131	--
	p	<.001	<.001	.062
Non-word reading Accuracy	r	.530**	.311**	.518**	.132	--
	p	<.001	<.001	<.001	.060
Non-word reading Speed	r	.507**	.716**	.374**	.644**	.354**	--
	p	<.001	<.001	<.001	<.001	<.001
Composite: Reading Accuracy	r	.926**	.517**	.701**	.243**	.758**	.525**	--
	p	<.001	<.001	<.001	<.001	<.001	<.001
Composite: Reading Speed	r	.507**	.933**	.326**	.821**	.307**	.861**	.499**	--
	p	<.001	<.001	<.001	<.001	<.001	<.001	<.001
** p < .01

## Sheet: Supplementary Table S2
Supplementary Table S2A: Descriptive statistics of electrophysiological variables
	N	Min	Max	Mean	SD
P1 STD Left	132	-3.63	8.28	2.84	1.73
P1 STD Right	132	-0.66	6.96	3.42	1.71
P1 DEVF Left	132	-2.25	7.68	2.46	2.04
P1 DEVF Right	132	-2.86	10.41	3.43	2.15
P1 DEVF Left	132	-1.58	9.69	2.67	2.09
P1 DEVF Right	132	-1.36	8.80	3.38	2.27
MMRF Left	132	-3.36	12.72	3.96	2.94
MMRF Right	132	-4.01	11.94	3.94	2.93
MMRF Left	132	-3.26	12.63	3.36	2.76
MMRF Right	132	-4.01	11.98	2.66	2.84
Supplementary Table S2B: Pearson correlations among ERP variables (N=132)
		P1 Left	P1 Right	MMRF Left	MMRF Right	MMRD Left	MMRD Right
P1 Left	r	--
	p
P1 Right	r	.582**	--
	p	<.001
MMRF Left	r	.163	-.027	--
	p	.061	.755
MMRF Right	r	.055	.112	.294**	--
	p	.538	.202	<.001
MMRD Left	r	.309**	.344**	.361**	.153	--
	p	<.001	<.001	<.001	.079
MMRD Right	r	.181*	.377**	-.022	.324**	.324**	--
	p	.038	<.001	.799	<.001	<.001
* p < .05; ** p < .01

## Sheet: Supplementary Table S3
Supplementary Table S3: Spearman correlations among variables included in the analyses and socio-demographic variables
			SES	Maternal education	Paternal education
Home literacy/music environment	Home literacy (HLEQ)	r	.197*	.229**	.125
		p	.019	.006	.140
		n	141	141	140
	Maternal musical environment	r	-.070	-.105	-.084
		p	.566	.388	.490
		n	70	70	70
	Paternal musical environment	r	-.025	-.017	.130
		p	.863	.906	.363
		n	51	51	51
Parental Reading skills	Maternal reading (self-report)	r	-.038	-.238**	.004
		p	.625	.002	.958
		n	170	170	169
	Paternal reading (self-report)	r	-.233**	-.052	-.168*
		p	.002	.500	.015
		n	170	170	170
Parental musical aptitudes	Maternal innovative musical aptitude	r	.039	.009	-.011
		p	.720	.936	.919
		n	86	86	86
	Maternal reactive musical behavior	r	-.082	-.046	-.096
		p	.455	.674	.377
		n	86	86	86
	Paternal innovative musical aptitude	r	.134	.162	.124
		p	.277	.187	.314
		n	68	68	68
	Paternal reactive musical behavior	r	-.078	-.059	-.031
		p	.529	.632	.800
		n	68	68	68
* p < .05; ** p < .01

## Sheet: Supplementary Table S4
Supplementary Table S4A: Pearson correlations among parental musical variables
			Maternal innovative musical aptitude	Paternal innovative musical aptitude	Maternal reactive musical behavior	Paternal reactive musical behavior
Maternal innovative musical aptitude		r	--
		p
		n
Paternal innovative musical aptitude		r	.129
		p	.310
		n	64
Maternal reactive musical behavior		r	.477**	.053
		p	<.001	.677
		n	87	64
Paternal reactive musical behavior		r	.029	.363**	.318*	--
		p	.821	.002	.011
		n	64	68	64
Supplementary Table S4B: Pearson correlations between parental musical variables and children variables
			Fathers			Mothers
			Innovative musical aptitude	Reactive musical behavior	Music environment	Innovative musical aptitude	Reactive musical behavior	Music environment
Electrophysiological variables (at 6 months)	P1 Left	r	-.085	-.012	.007	.165	.102	.230
		p	.574	.939	.969	.215	.448	.113
		n	46	46	38	58	58	49
	P1 Right	r	-.059	-.002	.086	.201	.203	.225
		p	.699	.990	.607	.130	.127	.121
		n	46	46	38	58	58	49
	MMRF Left	r	-.223	-.003	-.010	-.102	-.134	.175
		p	.135	.984	.952	.445	.316	.230
		n	46	46	38	58	58	49
	MMRF Right	r	-.268	.099	.201	-.028	.061	-.014
		p	.072	.514	.227	.837	.647	.927
		n	46	46	38	58	58	49
	MMRD Left	r	-.205	-.072	.136	.159	.175	.150
		p	.171	.634	.415	.234	.189	.305
		n	46	46	38	58	58	49
	MMRD Right	r	-.098	.012	.198	.179	.297*	.110
		p	.517	.935	.233	.180	.023	.452
		n	46	46	38	58	58	49
Phonological awareness (at 5 years)		r	.351*	.128	.398*	-.084	-.089	-.120
		p	.011	.364	.010	.506	.481	.390
		n	52	52	41	65	65	53
* p < .05; ** p < .01
